# Supplementary material
Source: publisher figshare collection journal article supplement (https://acs.figshare.com/ndownloader/files/28370572)
Supplement: Supplementary file 1 [file 28370572]

## Supplementary information

### Isolation, biological evaluation and molecular docking studies of compounds from *Sophora mollis* (Royle) Graham ex Baker

Mohammed Mansour Quradha<sup>1, 9</sup>, Rasool Khan<sup>1</sup>, Achyut Adhikari<sup>2</sup>, Abdur Rauf<sup>\*3</sup>, Umer Rashid<sup>4</sup>, Sami Bawazeer<sup>5</sup>, Yahya S. Al-Awthan<sup>6,7</sup>, Omar Bahattab<sup>6</sup>, Mohammad S. Mubarak<sup>8</sup>

<sup>1</sup>Institute of Chemical Sciences, University of Peshawar, Peshawar-25120, Pakistan;

<sup>2</sup> Central Department of Chemistry, Tribhuvan University, Kirtipur Kathmandu, Nepal

<sup>3</sup>Department of Chemistry, University of Swabi, Anbar 23430, Khyber Pakhtunkhwa, Pakistan

<sup>4</sup>Department of Chemistry, COMSATS University Islamabad, Abbottabad Campus, 22060 Abbottabad, Pakistan

<sup>5</sup>Pharmacognosy Department, College of Pharmacy, Umm Al-Qura University, Makkah, Saudi Arabia<sup>6</sup>Department of Biology, Faculty of Sciences, University of Tabuk, Tabuk, Saudia Arabia

<sup>7</sup>Department of Biology, Faculty of Science, Ibb University, Ibb, Yemen

<sup>8</sup>Department of Chemistry, The University of Jordan, Amman 11942, Jordan

<sup>9</sup>Faculty of Medical Sciences & Health, AL-Saeed University, Taiz, Yemen

### Corresponding Authors

\* Abdur Rauf ; ([mashaljcs@yahoo.com](mailto:mashaljcs@yahoo.com))

Spectroscopic data of compounds (**1-5**) isolated from *Sophora mollis*

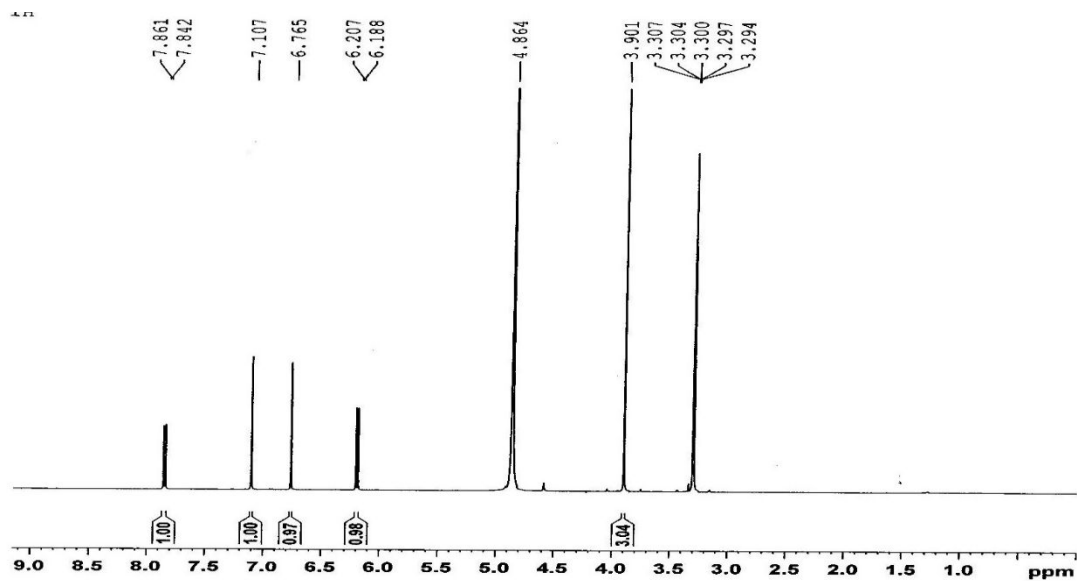

Figure S1: <sup>1</sup>H NMR spectrum of compound **1**

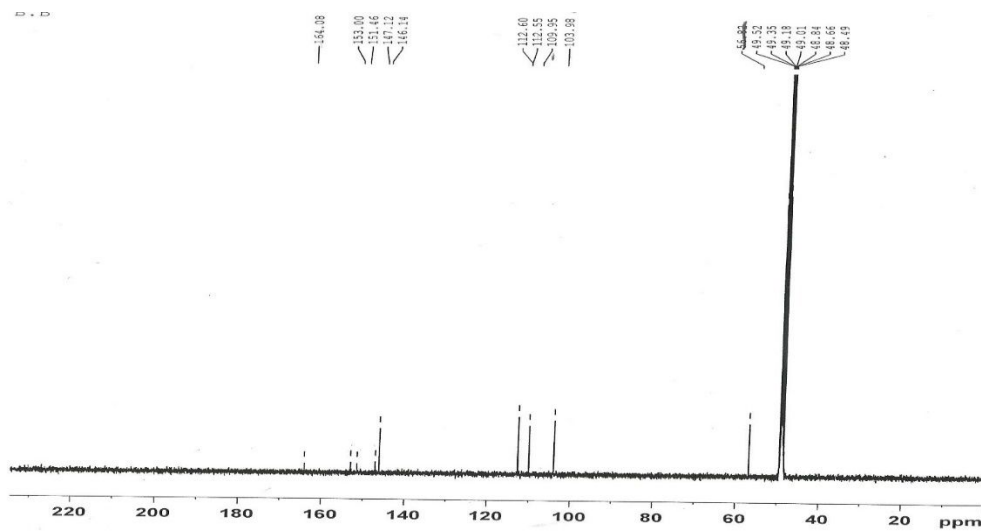

Figure S2: <sup>13</sup>C NMR spectrum of compound **1**

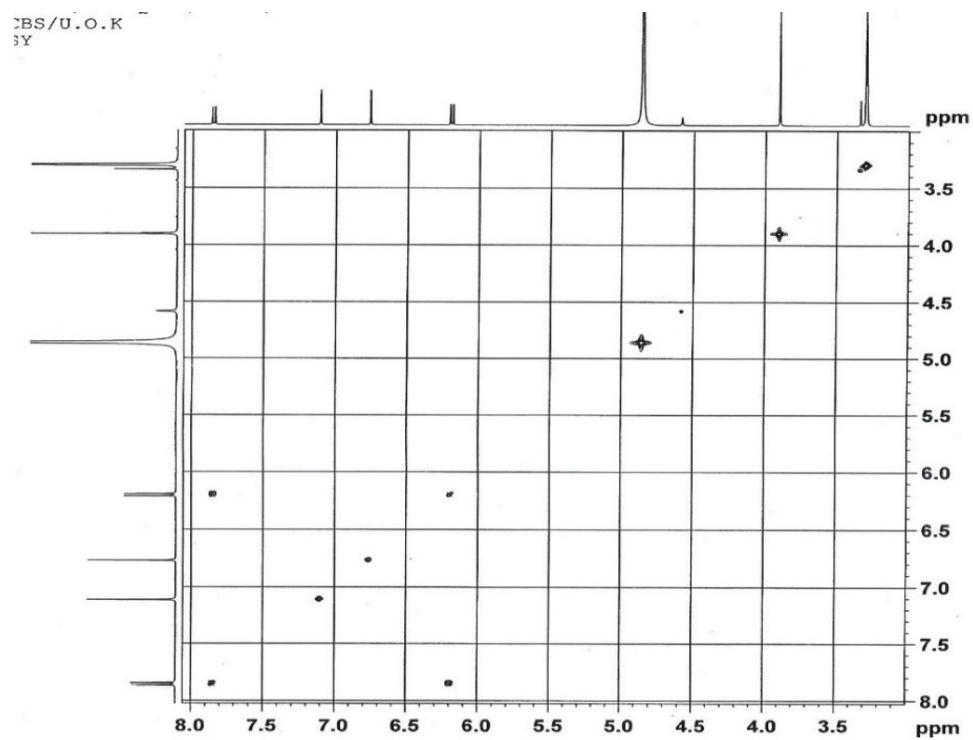Figure S3: COSY spectrum of compound **1**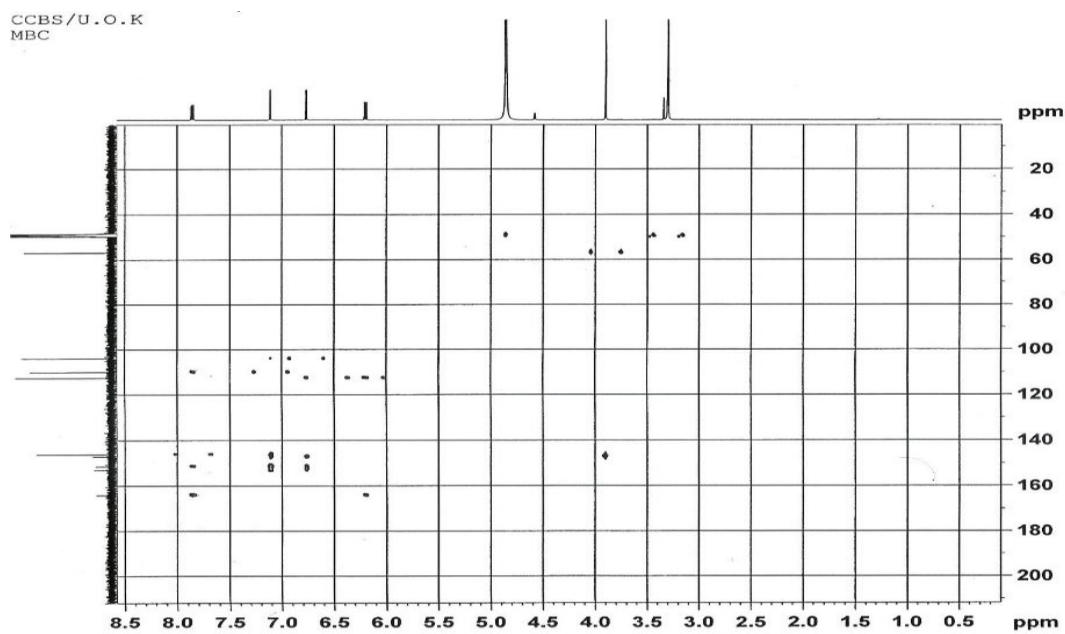Figure S4: HMBC spectrum of compound **1**

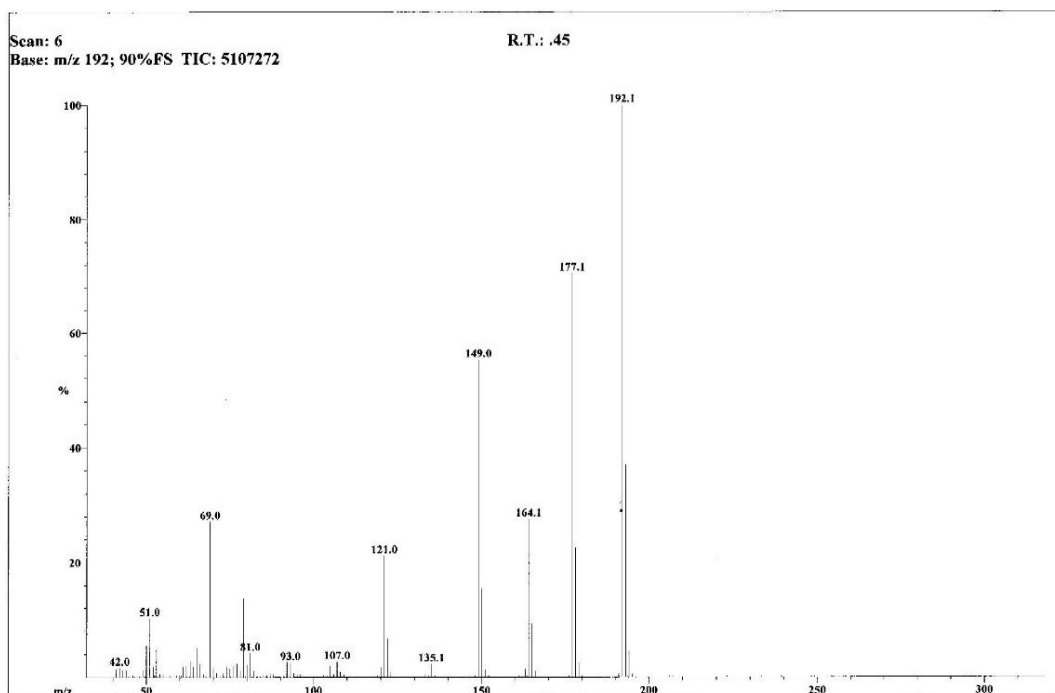

Figure S5: Mass spectrum of compound 1

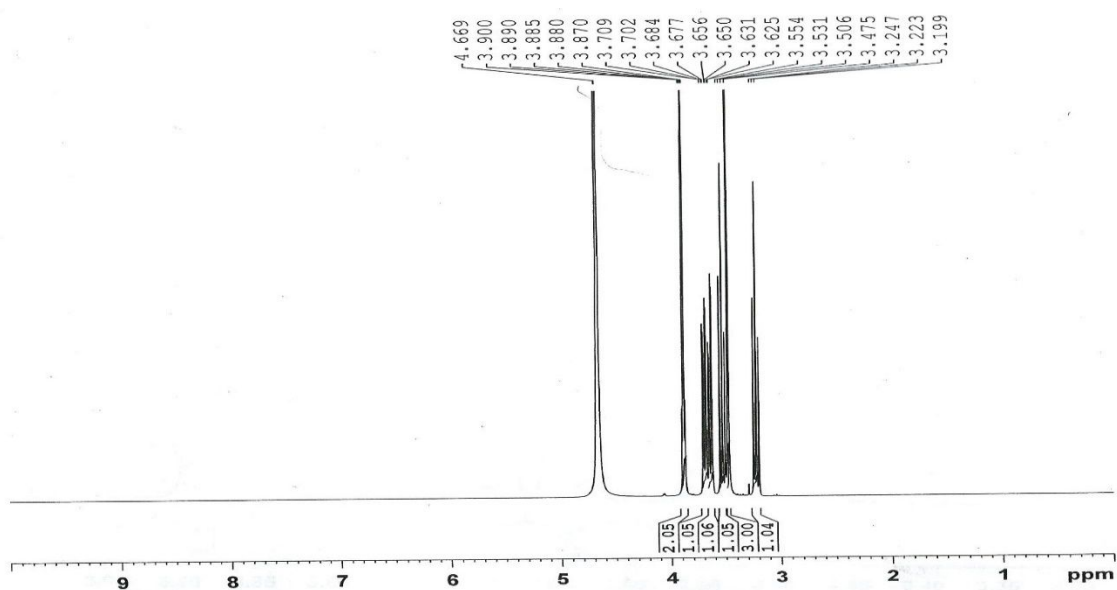Figure S6:  $^1\text{H}$  NMR spectrum of compound 2

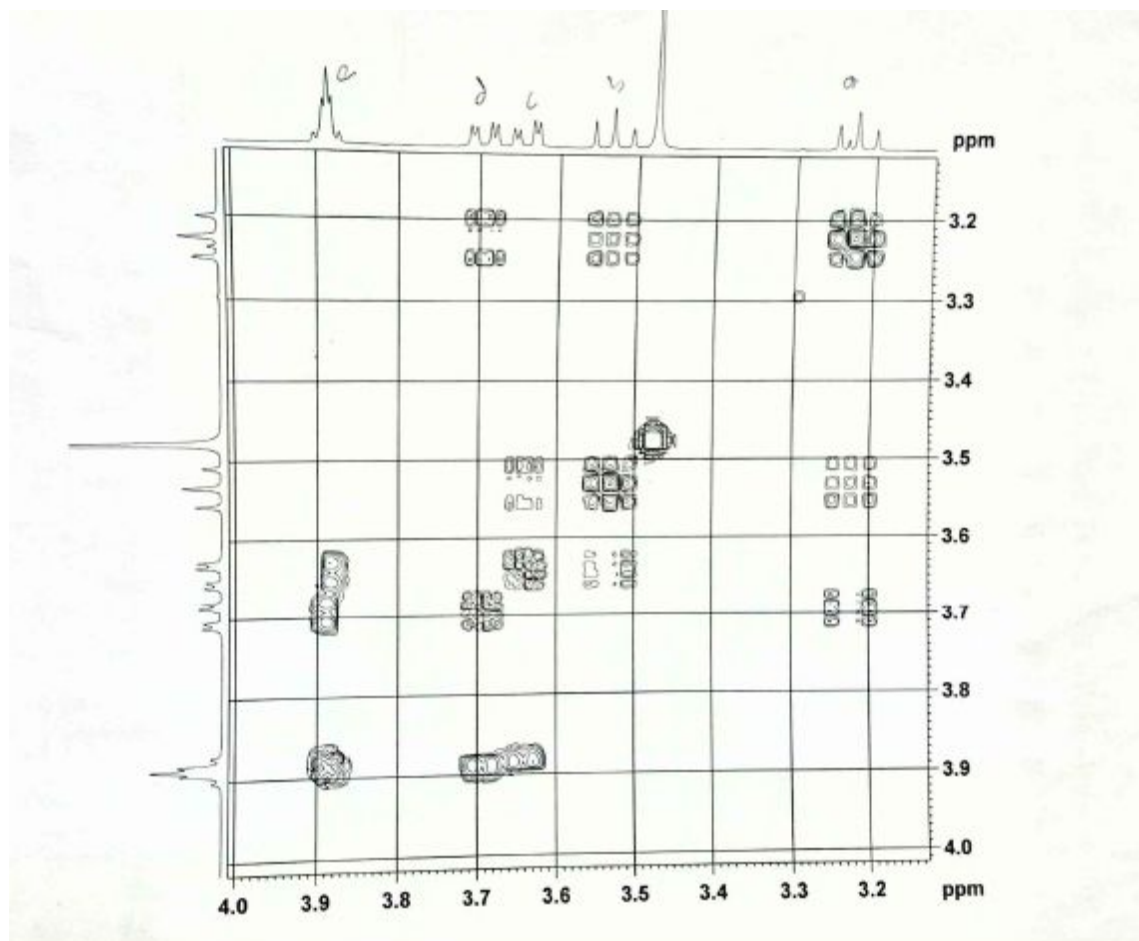

Figure S7: COSY spectrum of compound 2

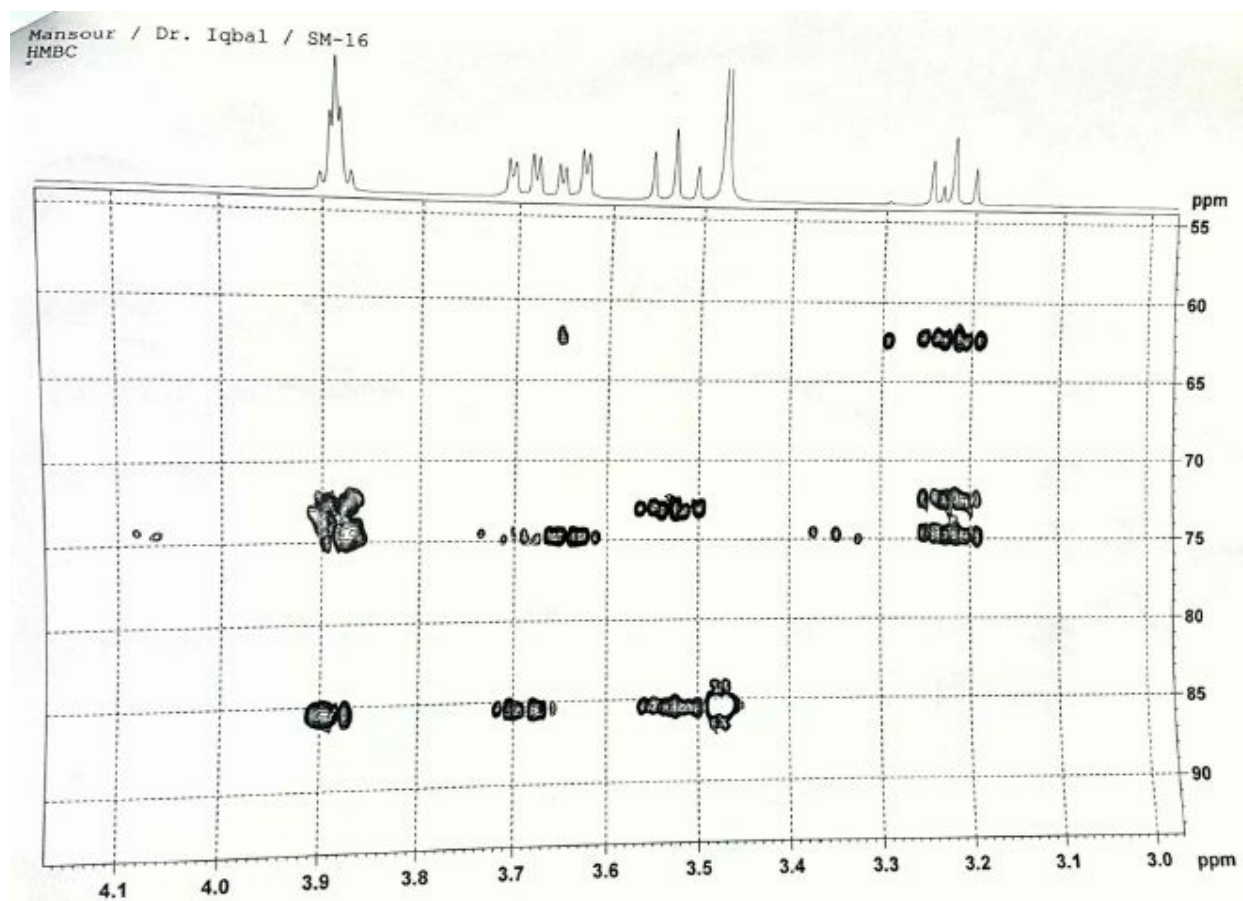

Figure S8: HMBC Spectrum of compound 2

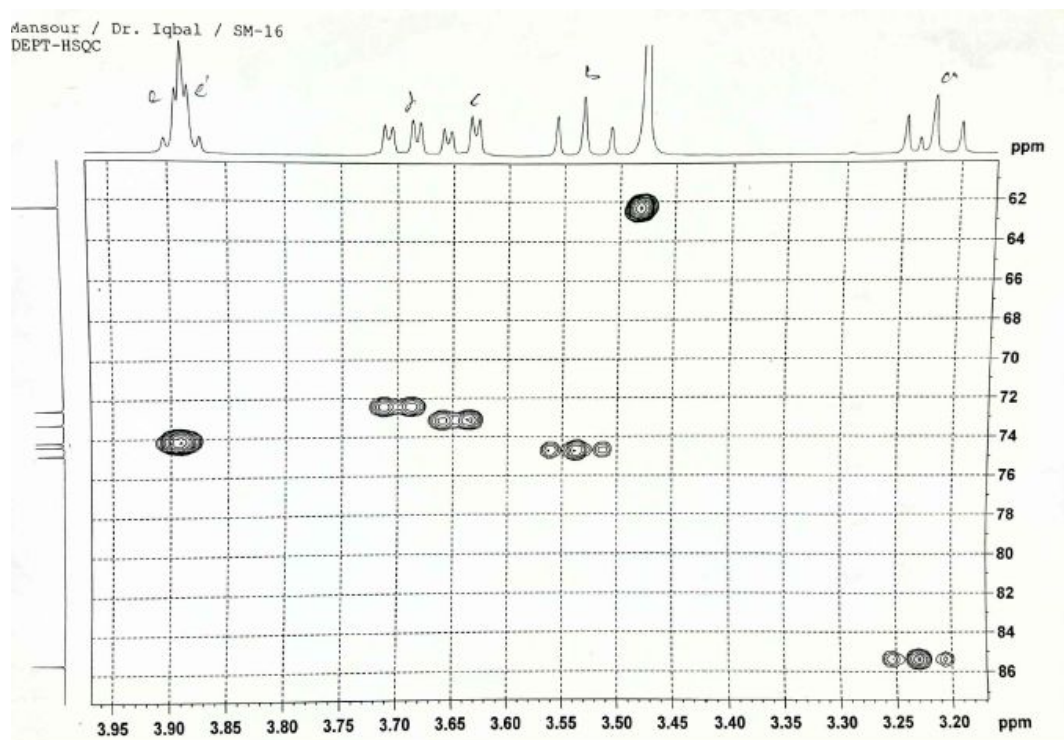

Figure S9: DEPT-HSQC Spectrum of compound **2**

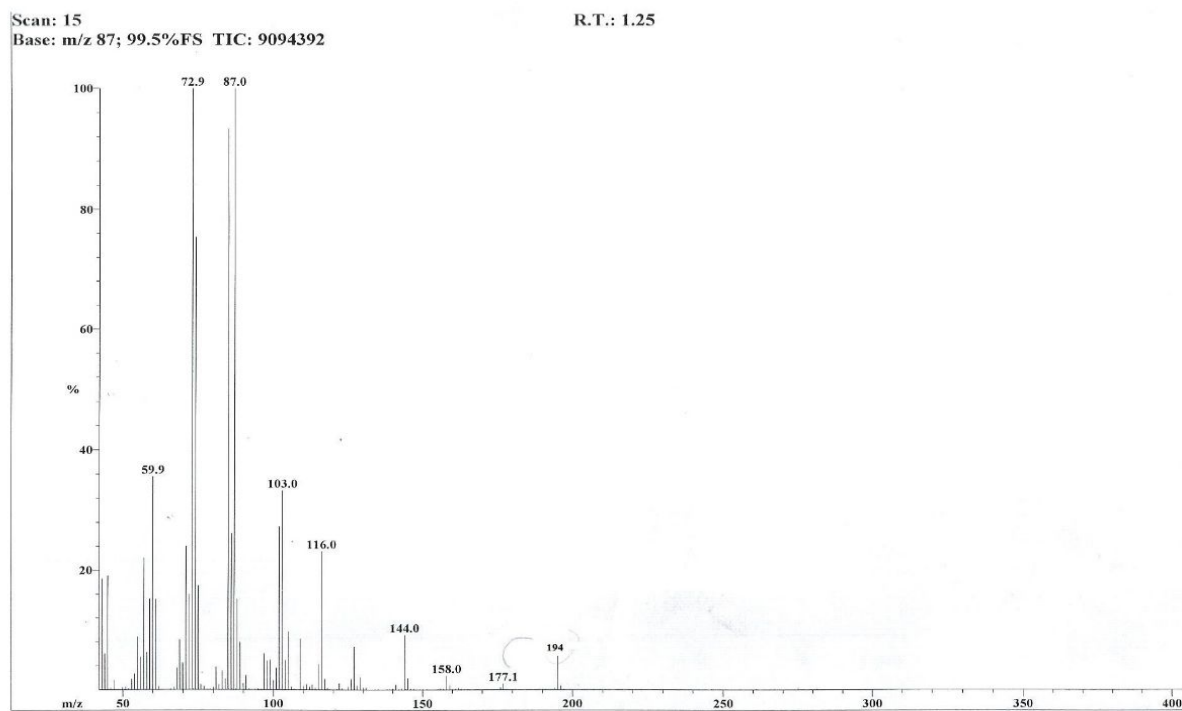

Figure S10: Mass spectrum of compound 2

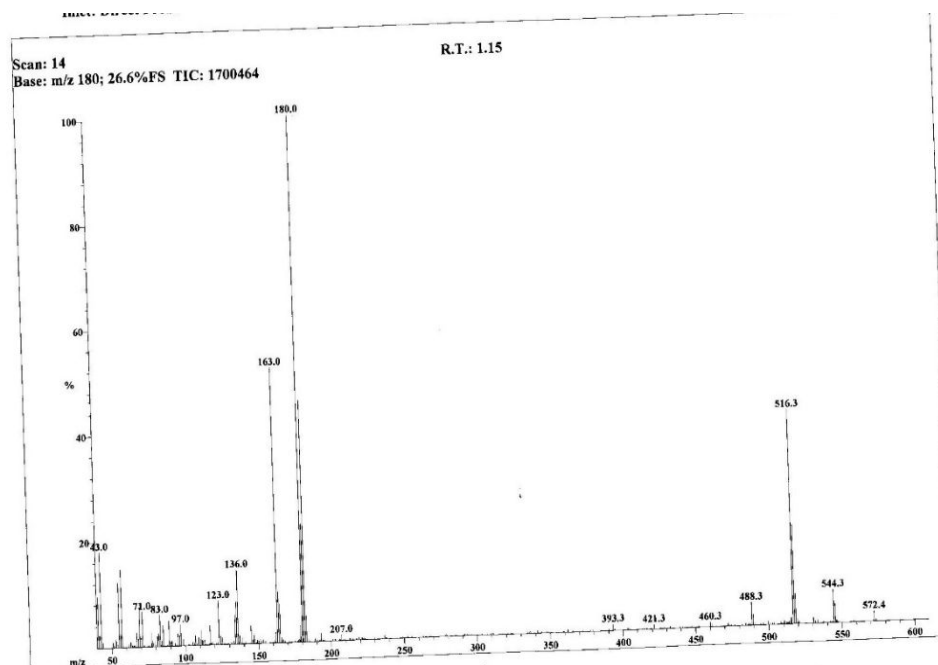

Figure S11: Mass spectrum of spectrum of compound 3



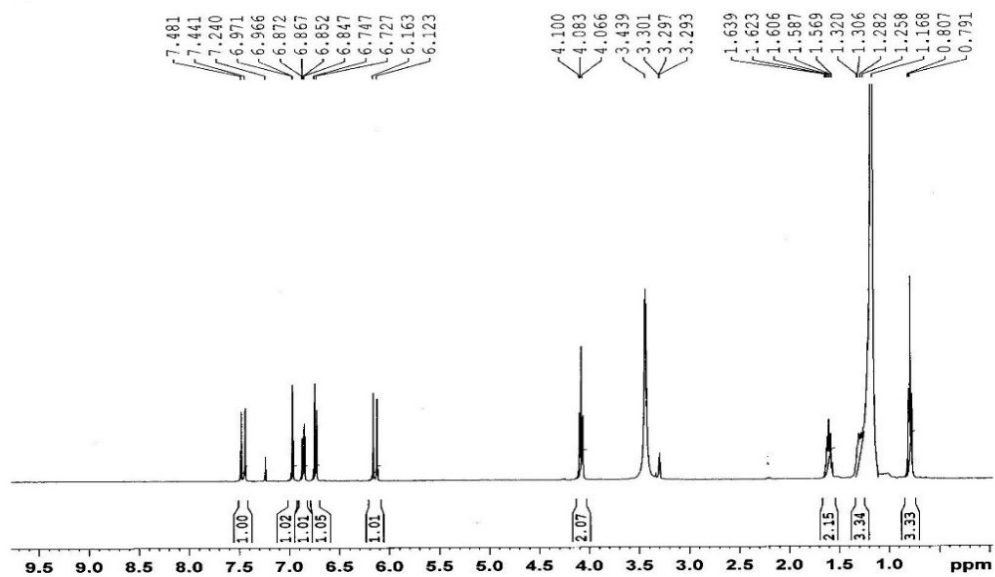Figure S12: <sup>1</sup>H NMR Spectrum of compound **3**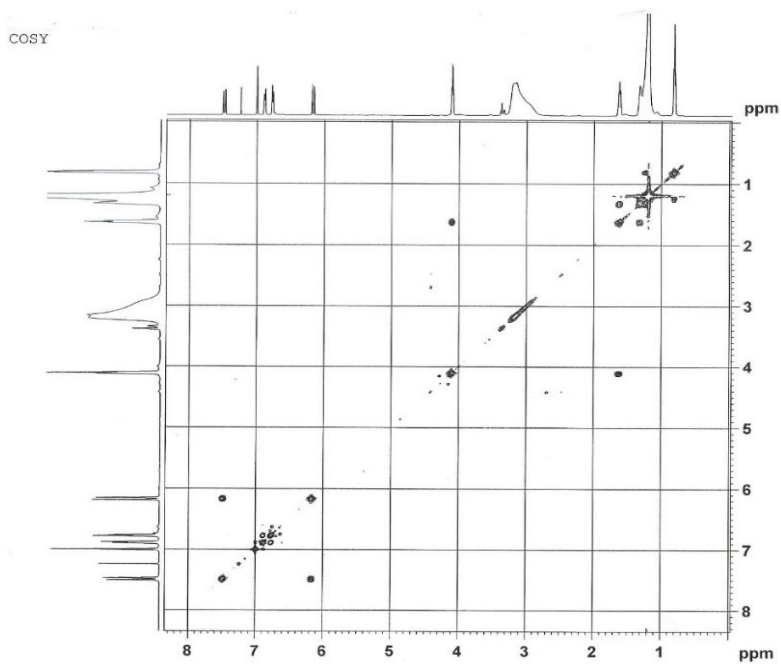Figure S13: COSY spectrum of spectrum of compound **3**

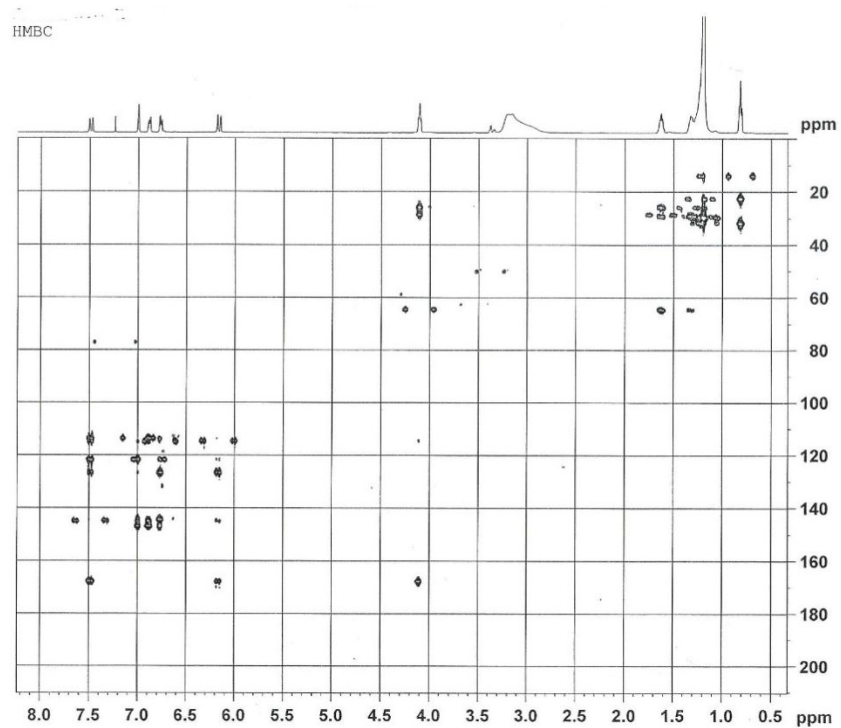Figure S14: HMBC spectrum of spectrum of compound **3**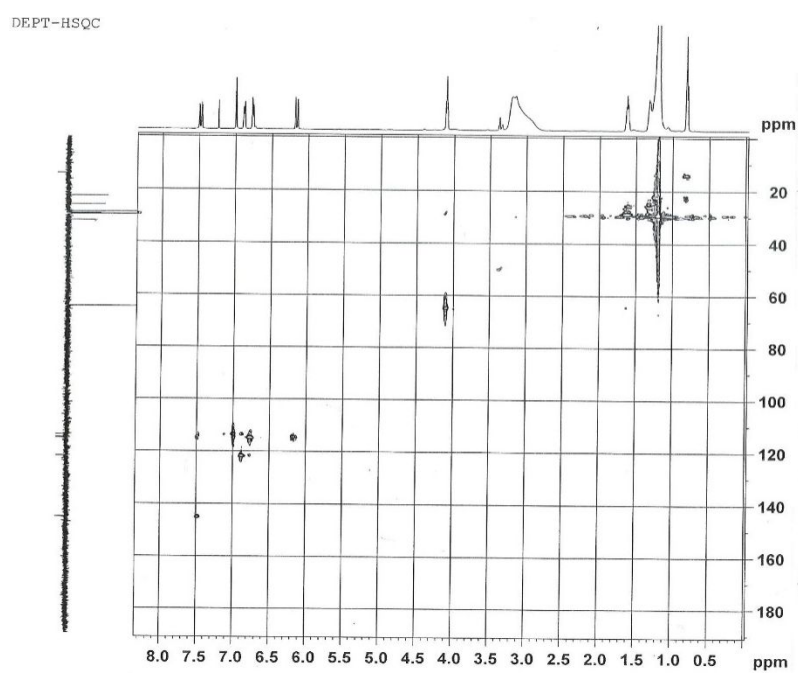Figure S15: DEPT-HSQC spectrum of compound **3**

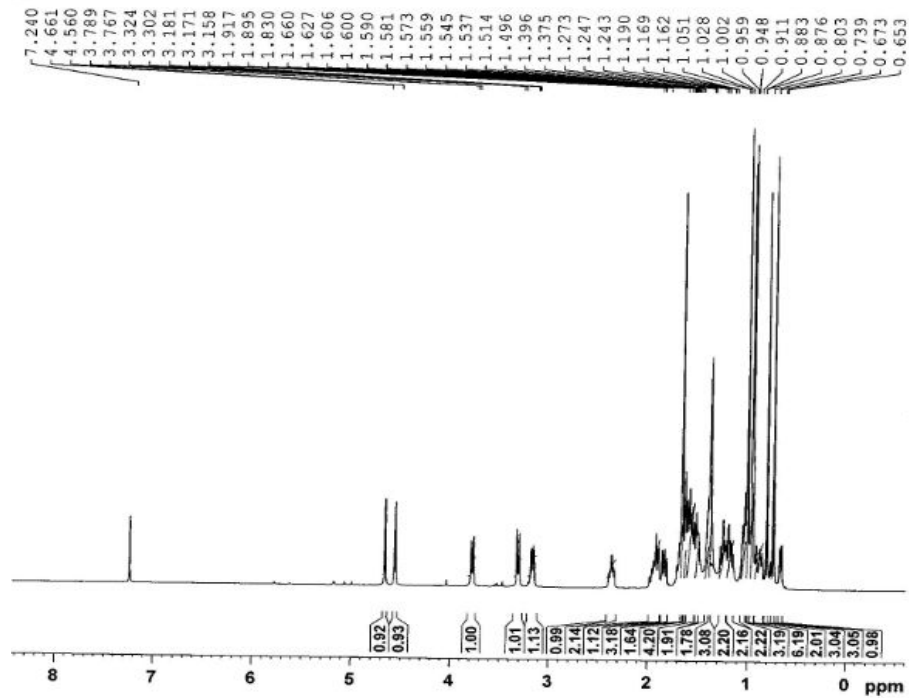Figure S16: <sup>1</sup>H NMR spectrum of compound 4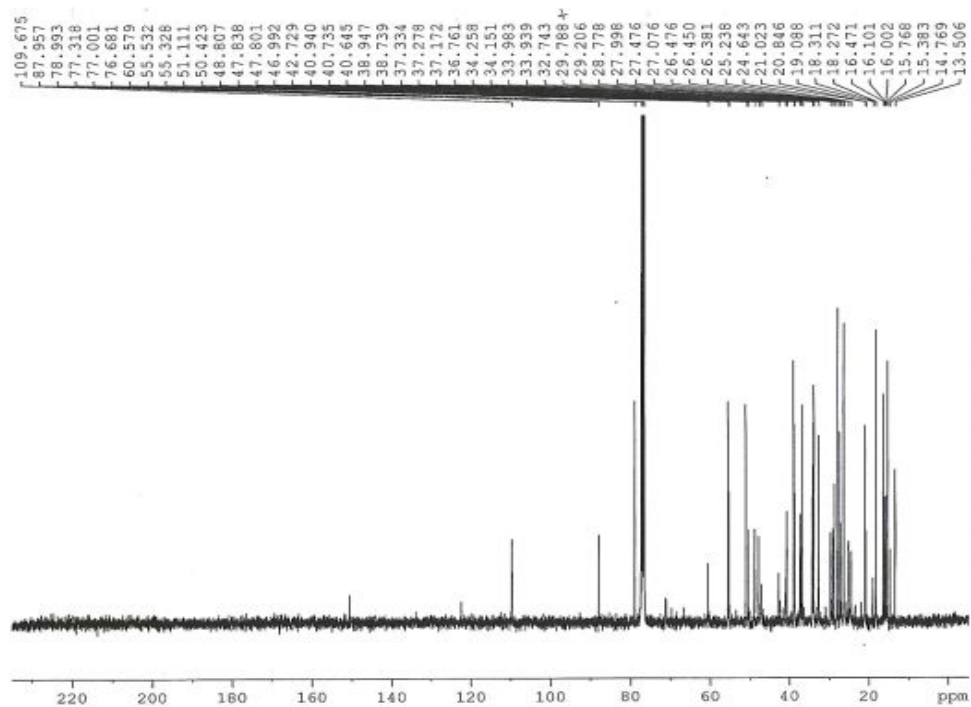

Figure S17:  $^{13}\text{C}$  NMR spectrum of compound 4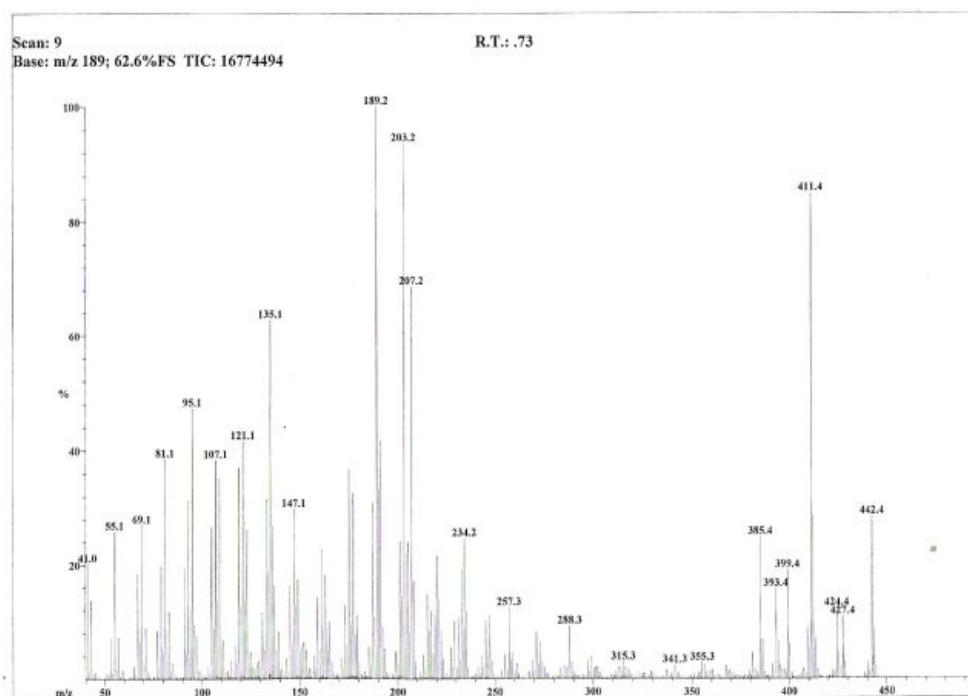

Figure S18: Mass spectrum of compound 4

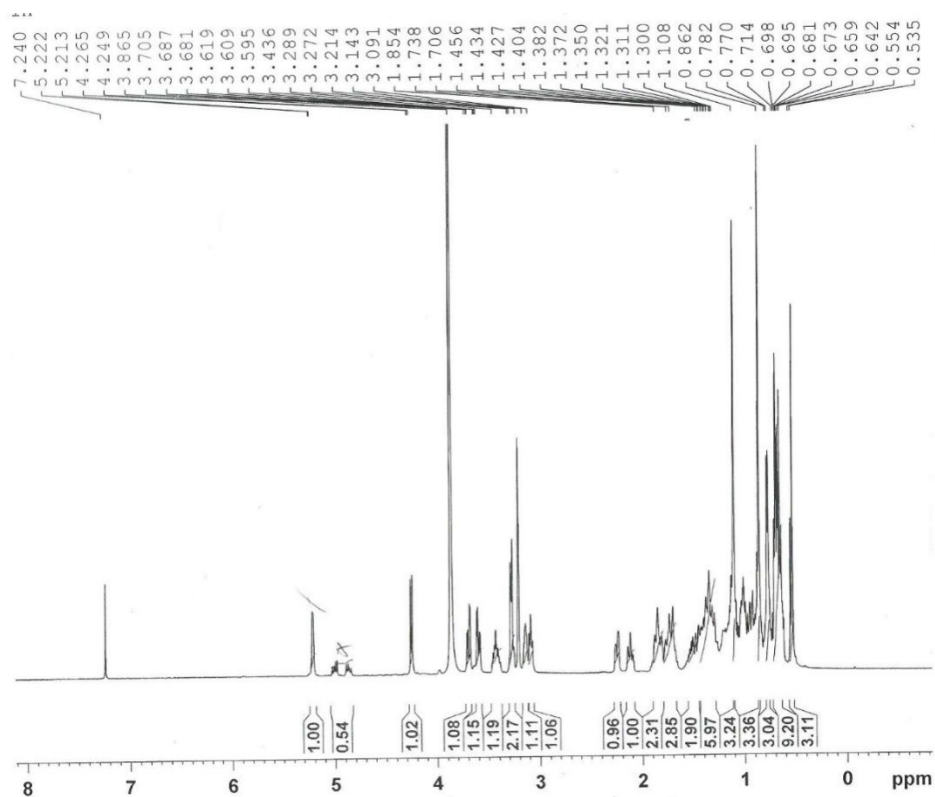Figure S19:  $^1\text{H}$ NMR spectrum of compound **5**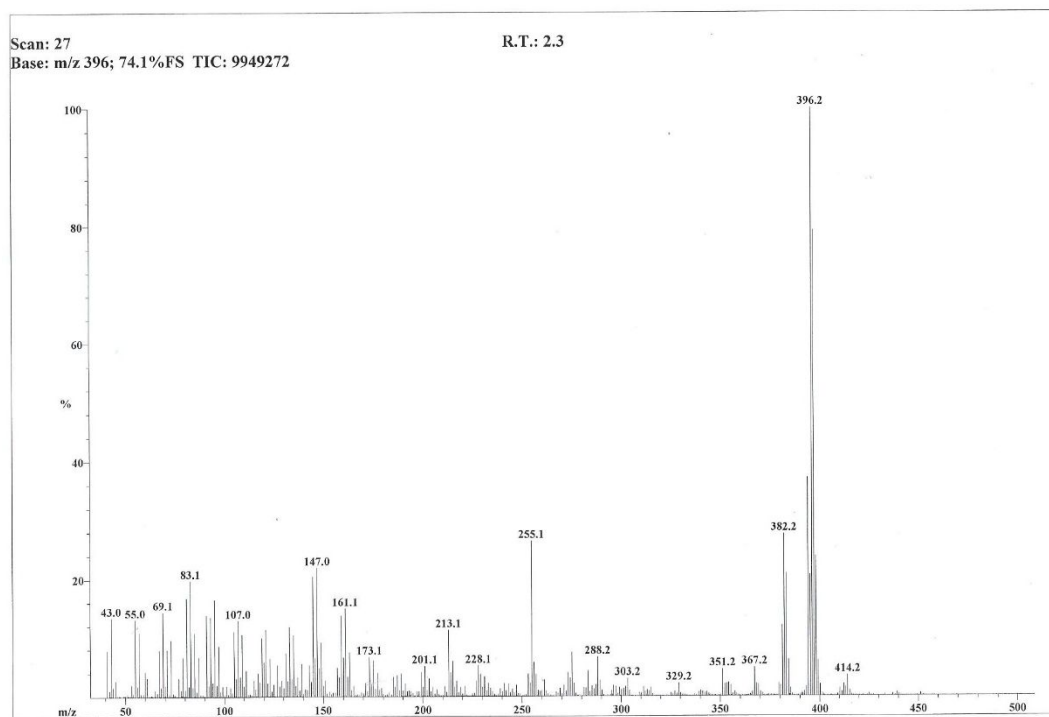Figure S20: Mass spectrum of compound **5**

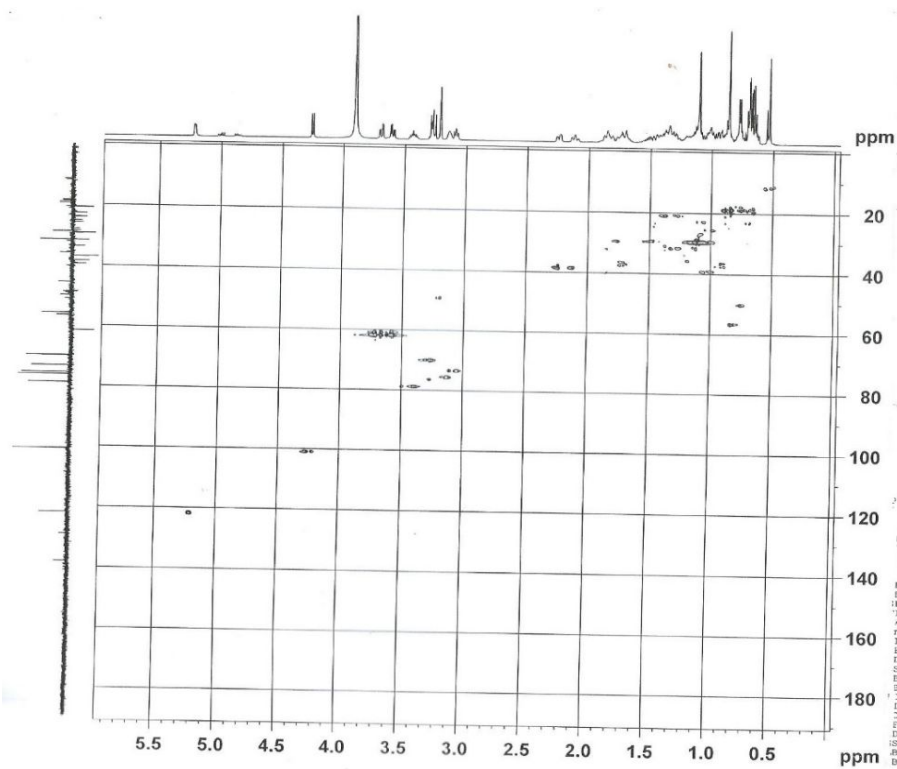

Figure S21: DEPT-HSQC spectrum of compound 5

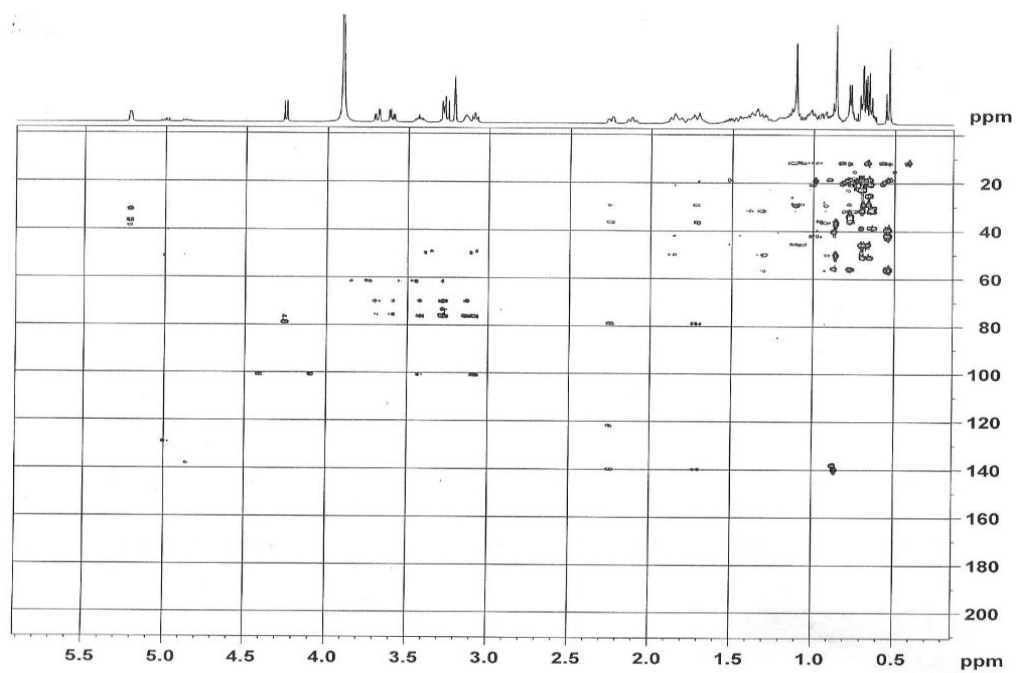

Figure S22: HMBC spectrum of compound 5
